# Supplementary material
Source: PubMed Central journal article supplement (PMC5573691)
Supplement: 12192_2017_800_MOESM1_ESM.pdf [file 12192_2017_800_MOESM1_ESM.pdf]

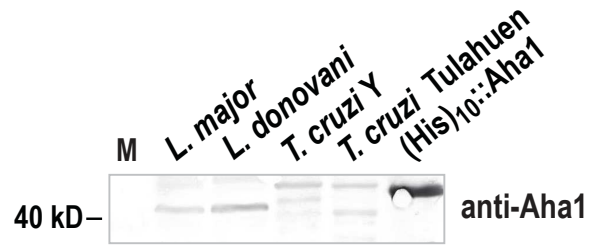

**Fig. S1** Anti-Aha1 antibody testing. (His)<sub>10</sub>::Aha1 was used to raise antibodies in a chicken. Western blot analysis showed that Aha1 antibodies recognise the natural protein in the lysates of *L. major*, *L. donovani*, the recombinant protein (His)<sub>10</sub>::Aha1, but not the orthologues in *T. cruzi* Y and *T. cruzi* Tulahuen lysates. Positions of size markers [kD] are shown on the left.
